# Supplementary material for: Genome-Wide Detection of Quantitative Trait Loci and Prediction of Candidate Genes for Seed Sugar Composition in Early Mature Soybean
Source: MDPI journal article supplement (doi:10.3390/ijms24043167), 2023-02-05
Supplement: s1 [file s1]

## Supplementary file

Table S1 Detail information of the candidate genes within the 100-Kb flanking region of SNPs associated with fructose, glucose, sucrose, raffinose, stachyose and total sugar contents.

Figure S1 Model-compare FDR and type I error plot of association analysis for 323 soybean accessions.

Figure S2 Quantile-quantile plot of association analysis for 323 soybean accessions.

| Trait    | SNP ID        | Gene model      | Distance to SNP(Kb) | Annotation                                                                                |
|----------|---------------|-----------------|---------------------|-------------------------------------------------------------------------------------------|
| Fructose | Gm02_13523639 | Glyma.02g130700 | 33.98               | Phosphoenolpyruvate carboxylase 4                                                         |
| Fructose |               | Glyma.02g130800 | 26.1                | Unknown function                                                                          |
| Fructose |               | Glyma.02g130900 | 17.84               | NUDIX hydrolase 1                                                                         |
| Fructose |               | Glyma.02g131000 | 0.16                | NUDIX hydrolase 1                                                                         |
| Fructose |               | Glyma.02g131100 | 11.7                | NADP pyrophosphatase                                                                      |
| Fructose |               | Glyma.02g131200 | 11.2                | Protein of unknown function, DUF617                                                       |
| Fructose |               | Glyma.02g131300 | 27.28               | Inflorescence deficient in abscission (IDA)-like 1                                        |
| Fructose | Gm02_39812316 | Glyma.02g131400 | 43.14               | Pectin methylesterase inhibitor 1                                                         |
| Fructose |               | Glyma.02g131500 | 47.35               | 3-methylcrotonyl-CoA carboxylase                                                          |
| Fructose |               | Glyma.02g212100 | 49.17               | Unknown function                                                                          |
| Fructose |               | Glyma.02g212200 | 31.38               | Sequence-specific DNA binding transcription factors                                       |
| Fructose |               | Glyma.02g212300 | 32.69               | Conserved peptide upstream open reading frame 37                                          |
| Fructose |               | Glyma.02g212400 | 4.31                | CYCLIN-D4-1-RELATED                                                                       |
| Fructose |               | Glyma.02g212500 | 39.15               | Chaperone DNAJ-domain superfamily protein                                                 |
| Fructose | Gm04_4733978  | Glyma.04g057600 | 48.71               | Translation initiation factor 3b1                                                         |
| Fructose |               | Glyma.04g057700 | 27.37               | Integrase-type DNA-binding superfamily protein                                            |
| Fructose |               | Glyma.04g057800 | 0                   | FAE1/Type III polyketide synthase-like protein                                            |
| Fructose |               | Glyma.04g057900 | 11.24               | Hydroxyproline-rich glycoprotein family protein                                           |
| Fructose |               | Glyma.04g058000 | 16.1                | Integral component of membrane                                                            |
| Fructose |               | Glyma.04g058100 | 30.86               | HXXXD-type acyl-transferase family protein                                                |
| Fructose |               | Glyma.04g058200 | 36.28               | F-box family protein                                                                      |
| Fructose | Gm04_49873994 | Glyma.04g058300 | 42.4                | Ubiquitin-specific protease 19                                                            |
| Fructose |               | Glyma.04g229300 | 49.7                | SER/ARG-rich protein 34A                                                                  |
| Fructose |               | Glyma.04g229400 | 40.36               | CTC-interacting domain 11                                                                 |
| Fructose |               | Glyma.04g229500 | 16.28               | CTC-interacting domain 11                                                                 |
| Fructose |               | Glyma.04g229600 | 9.17                | RNA-binding (RRM/RBD/RNP motifs) family protein                                           |
| Fructose |               | Glyma.04g229700 | 1.58                | Unknown function                                                                          |
| Fructose |               | Glyma.04g229800 | 0.13                | Heat shock protein 21                                                                     |
| Fructose | Gm05_5397251  | Glyma.04g229900 | 8.74                | Unknown function                                                                          |
| Fructose |               | Glyma.04g230000 | 14.84               | Unknown function                                                                          |
| Fructose |               | Glyma.04g230100 | 17.19               | Unknown function                                                                          |
| Fructose |               | Glyma.04g230200 | 22.36               | Unknown function                                                                          |
| Fructose |               | Glyma.04g230300 | 25.08               | Leucine-rich repeat protein kinase family protein                                         |
| Fructose |               | Glyma.04g230400 | 30.86               | Unknown function                                                                          |
| Fructose |               | Glyma.04g230500 | 37.16               | Leucine-rich repeat protein kinase family protein                                         |
| Fructose | Gm05_5397251  | Glyma.04g230600 | 43.54               | Growth-regulating factor 7                                                                |
| Fructose |               | Glyma.05g057700 | 51.38               | Bifunctional inhibitor/lipid-transfer protein/seed storage 2s albumin superfamily protein |
| Fructose |               | Glyma.05g057800 | 35.4                | Bifunctional inhibitor/lipid-transfer protein/seed storage 2s albumin superfamily protein |
| Fructose |               | Glyma.05g057900 | 44.99               | Unknown function                                                                          |
| Fructose |               | Glyma.05g058000 | 19.38               | Integral component of membrane                                                            |
| Fructose |               | Glyma.05g058100 | 15.42               | Lactate/malate dehydrogenase family protein                                               |

|          |               |                 |       |                                                                          |
|----------|---------------|-----------------|-------|--------------------------------------------------------------------------|
| Fructose |               | Glyma.05g058200 | 2.39  | YbaK/aminoacyl-tRNA synthetase-associated domain                         |
| Fructose |               | Glyma.05g058300 | 7.11  | Ubiquitin-like superfamily protein                                       |
| Fructose |               | Glyma.05g058400 | 14.48 | Integral component of membrane                                           |
| Fructose |               | Glyma.05g058500 | 23.66 | P-loop containing nucleoside triphosphate hydrolases superfamily protein |
| Fructose |               | Glyma.05g058600 | 38.28 | Heavy metal transport/detoxification superfamily protein                 |
| Fructose |               | Glyma.05g058700 | 41.89 | Plant VAP homolog 12                                                     |
| Fructose | Gm05_36311870 | Glyma.05g172900 | 46.78 | TRNA synthetase beta subunit family protein                              |
| Fructose |               | Glyma.05g173000 | 43.56 | Unknown function                                                         |
| Fructose |               | Glyma.05g173100 | 37.28 | Ribosomal protein-related                                                |
| Fructose |               | Glyma.05g173200 | 35.18 | Phloem development                                                       |
| Fructose |               | Glyma.05g173300 | 30.17 | Cellulase (glycosyl hydrolase family 5) protein                          |
| Fructose |               | Glyma.05g173400 | 24.72 | Cellulase (glycosyl hydrolase family 5) protein                          |
| Fructose |               | Glyma.05g173500 | 17.72 | COPINE (calcium-dependent phospholipid-binding protein) family           |
| Fructose |               | Glyma.05g173600 | 12.14 | Unknown function                                                         |
| Fructose |               | Glyma.05g173700 | 9.64  | Integral component of membrane                                           |
| Fructose |               | Glyma.05g173800 | 3.15  | Unknown function                                                         |
| Fructose |               | Glyma.05g173900 | 4.18  | Pentatricopeptide repeat (PPR-like) superfamily protein                  |
| Fructose |               | Glyma.05g174000 | 2.13  | Mitogen-activated protein kinase phosphatase 1                           |
| Fructose |               | Glyma.05g174100 | 6.78  | Senescence associated gene 18                                            |
| Fructose |               | Glyma.05g174200 | 11.98 | Melibiose family protein                                                 |
| Fructose |               | Glyma.05g174300 | 18.98 | 60s acidic ribosomal protein family                                      |
| Fructose |               | Glyma.05g174400 | 25.55 | Eukaryotic translation initiation factor 4B1                             |
| Fructose |               | Glyma.05g174500 | 28.92 | Integral component of membrane                                           |
| Fructose |               | Glyma.05g174600 | 33.02 | Chloroplast sensor kinase                                                |
| Fructose | Gm06_19321023 | Glyma.06g204500 | 40.64 | Haloacid dehalogenase-like hydrolase (HAD) superfamily protein           |
| Fructose |               | Glyma.06g204600 | 4.95  | Histone-lysine N-methyltransferases                                      |
| Fructose |               | Glyma.06g204700 | 2.39  | TTF-type zinc finger protein with HAT dimerisation domain                |
| Fructose |               | Glyma.06g204800 | 3.744 | Galactose oxidase/kelch repeat superfamily protein                       |
| Fructose |               | Glyma.06g204900 | 32.84 | Mitochondrial transcription termination factor family protein            |
| Fructose | Gm06_34566459 | Glyma.06g227800 | 43.37 | ARM repeat superfamily protein                                           |
| Fructose |               | Glyma.06g227900 | 32.89 | Unknown function                                                         |
| Fructose |               | Glyma.06g228000 | 14.23 | DNAJ heat shock family protein                                           |
| Fructose |               | Glyma.06g228100 | 31.98 | Unknown function                                                         |
| Fructose | Gm06_36593777 | None            |       |                                                                          |
| Fructose | Gm06_38660086 | Glyma.06g236600 | 20.3  | Integral component of membrane                                           |
| Fructose |               | Glyma.06g236700 | 10.14 | Pentatricopeptide repeat (PPR-like) superfamily protein                  |
| Fructose |               | Glyma.06g236800 | 0     | Lon protease 1                                                           |
| Fructose |               | Glyma.06g236900 | 2.3   | HAT dimerisation domain-containing protein                               |
| Fructose |               | Glyma.06g237000 | 5.48  | Myosin family protein                                                    |

|          |               |                 |       |                                                                                           |
|----------|---------------|-----------------|-------|-------------------------------------------------------------------------------------------|
| Fructose |               | Glyma.06g237100 | 3.39  | HAT dimerisation domain-containing protein / transposase-related                          |
| Fructose |               | Glyma.06g237200 | 4.17  | Leucine-rich repeat transmembrane protein kinase family protein                           |
| Fructose |               | Glyma.06g237300 | 22.24 | Photosystem II stability/assembly factor, chloroplast (HCF136)                            |
| Fructose | Gm07_13530340 | Glyma.07g118800 | 0     | Actin-related protein 4                                                                   |
| Fructose |               | Glyma.07g118900 | 23.08 | Nucleotide-diphospho-sugar transferase family protein                                     |
| Fructose |               | Glyma.07g119000 | 37.53 | RNA-BINDING PROTEIN 28                                                                    |
| Fructose | Gm11_11249766 | Glyma.11g145500 | 50.36 | Auxin response factor 10                                                                  |
| Fructose |               | Glyma.11g145600 | 35.9  | SIT4 phosphatase-associated family protein                                                |
| Fructose |               | Glyma.11g145700 | 23.24 | UPF0497                                                                                   |
| Fructose |               | Glyma.11g145800 | 13.92 | Homeobox-leucine zipper family protein / lipid-binding start domain-containing protein    |
| Fructose |               | Glyma.11g145900 | 0     | EUKARYOTE SPECIFIC DSRNA BINDING PROTEIN                                                  |
| Fructose |               | Glyma.11g146000 | 13.41 | SAND family protein                                                                       |
| Fructose |               | Glyma.11g146100 | 16.27 | NADH-Ubiquinone/plastoquinone (complex I) protein                                         |
| Fructose |               | Glyma.11g146200 | 22.19 | Protein of unknown function, DUF584                                                       |
| Fructose |               | Glyma.11g146300 | 38.65 | Ribosomal protein l11 family protein                                                      |
| Fructose |               | Glyma.11g146400 | 40.15 | Unknown function                                                                          |
| Fructose | Gm11_32043302 | Glyma.11g225000 | 48.61 | Bifunctional inhibitor/lipid-transfer protein/seed storage 2s albumin superfamily protein |
| Fructose |               | Glyma.11g225100 | 46.44 | MATERNAL effect embryo arrest 60                                                          |
| Fructose |               | Glyma.11g225200 | 41.48 | Rop guanine nucleotide exchange factor 5                                                  |
| Fructose |               | Glyma.11g225300 | 0     | Guanylyl cyclase 1                                                                        |
| Fructose |               | Glyma.11g225400 | 12.31 | Unknown function                                                                          |
| Fructose |               | Glyma.11g225500 | 22.46 | UDP-Glycosyltransferase superfamily protein                                               |
| Fructose |               | Glyma.11g225600 | 28.2  | UDP-Glycosyltransferase superfamily protein                                               |
| Fructose |               | Glyma.11g225700 | 31.6  | Protein of unknown function (DUF620)                                                      |
| Fructose | Gm13_13865523 | Glyma.13g044600 | 28.61 | Alpha/beta-hydrolases superfamily protein                                                 |
| Fructose |               | Glyma.13g044700 | 38.85 | Unknown function                                                                          |
| Fructose |               | Glyma.13g044800 | 12.5  | Sterol 1                                                                                  |
| Fructose |               | Glyma.13g044900 | 4.53  | Unknown function                                                                          |
| Fructose |               | Glyma.13g045000 | 0     | Predicted transporter (major facilitator superfamily)                                     |
| Fructose |               | Glyma.13g045100 | 17.75 | GDSL-like Lipase/Acylhydrolase superfamily protein                                        |
| Fructose |               | Glyma.13g045200 | 25.76 | Unknown function                                                                          |
| Fructose |               | Glyma.13g045300 | 45.87 | Unknown function                                                                          |
| Fructose | Gm13_24748152 | Glyma.13g134500 | 43.08 | Phosphatidic acid phosphohydrolase 2                                                      |
| Fructose |               | Glyma.13g134600 | 32.9  | Lung seven transmembrane receptor family protein                                          |
| Fructose |               | Glyma.13g134700 | 25.35 | Unknown function                                                                          |
| Fructose |               | Glyma.13g134800 | 17.63 | Putative zinc- or iron-chelating domain                                                   |
| Fructose |               | Glyma.13g134900 | 13.94 | Membrane                                                                                  |
| Fructose |               | Glyma.13g135000 | 5.51  | Pentatricopeptide repeat (PPR) superfamily protein                                        |
| Fructose |               | Glyma.13g135100 | 1.71  | Ring/u-box superfamily protein                                                            |

|          |               |                 |       |                                                                                      |
|----------|---------------|-----------------|-------|--------------------------------------------------------------------------------------|
| Fructose |               | Glyma.13g135200 | 9.96  | Unknown function                                                                     |
| Fructose |               | Glyma.13g135300 | 22.52 | Protein phosphatase 2C family protein                                                |
| Fructose |               | Glyma.13g135400 | 38.09 | Integral membrane TerC family protein                                                |
| Fructose | Gm13_45487373 | Glyma.13g368900 | 47.48 | RNI-like superfamily protein                                                         |
| Fructose |               | Glyma.13g369000 | 36.7  | Unknown function                                                                     |
| Fructose |               | Glyma.13g369100 | 19.45 | Protein kinase superfamily protein                                                   |
| Fructose |               | Glyma.13g369200 | 16.89 | Unknown function                                                                     |
| Fructose |               | Glyma.13g369300 | 11.58 | ATPASE 1, PLASMA MEMBRANE-TYPE-RELATED                                               |
| Fructose |               | Glyma.13g369400 | 6.42  | Integrase-type DNA-binding superfamily protein                                       |
| Fructose |               | Glyma.13g369500 | 11.01 | Zinc-finger protein 1                                                                |
| Fructose |               | Glyma.13g369600 | 22.78 | Unknown function                                                                     |
| Fructose |               | Glyma.13g369700 | 33.74 | Ribosomal protein L7Ae/L30e/S12e/Gadd45 family protein                               |
| Fructose |               | Glyma.13g369800 | 38.83 | NAD(P)-binding domain                                                                |
| Fructose |               | Glyma.13g369900 | 42.2  | NRAMP metal ion transporter 6                                                        |
| Fructose | Gm15_548936   | Glyma.15g005700 | 49.86 | Unknown function                                                                     |
| Fructose |               | Glyma.15g005800 | 47.84 | Sterile alpha motif (SAM) domain-containing protein                                  |
| Fructose |               | Glyma.15g005900 | 42.76 | Hydroxyproline-rich glycoprotein family protein                                      |
| Fructose |               | Glyma.15g006000 | 35.38 | Transmembrane amino acid transporter family protein                                  |
| Fructose |               | Glyma.15g006100 | 10.67 | TOPLESS-related 1                                                                    |
| Fructose |               | Glyma.15g006200 | 10.09 | Leucine-rich repeat family protein                                                   |
| Fructose |               | Glyma.15g006300 | 3.218 | CALCINEURIN B SUBUNIT (PROTEIN<br>PHOSPHATASE 2B REGULATORY SUBUNIT)-LIKE<br>PROTEIN |
| Fructose |               | Glyma.15g006400 | 0     | NADH DEHYDROGENASE [UBIQUINONE]<br>FLAVOPROTEIN 2, MITOCHONDRIAL                     |
| Fructose |               | Glyma.15g006500 | 2.34  | BED FINGER-RELATED                                                                   |
| Fructose |               | Glyma.15g006600 | 10.29 | Phox (PX) domain-containing protein                                                  |
| Fructose |               | Glyma.15g006700 | 13.87 | Signal recognition particle, srp54 subunit protein                                   |
| Fructose |               | Glyma.15g006800 | 17.79 | Membrane                                                                             |
| Fructose |               | Glyma.15g006900 | 20.28 | Molecular chaperone hsp40/DNAj family protein                                        |
| Fructose |               | Glyma.15g007000 | 30.06 | Ubiquitin system component cue protein                                               |
| Fructose |               | Glyma.15g007100 | 35.94 | Pre-mRNA-processing-splicing factor                                                  |
| Fructose | Gm16_97490    | Glyma.16g000500 | 39.25 | Embryo defective 140                                                                 |
| Fructose |               | Glyma.16g000600 | 51.2  | Unknown function                                                                     |
| Fructose |               | Glyma.16g000700 | 35.28 | Core-2/I-branching beta-1,6-N-<br>acetylglucosaminyltransferase family protein       |
| Fructose |               | Glyma.16g000800 | 31.25 | Protein of unknown function (DUF707)                                                 |
| Fructose |               | Glyma.16g000900 | 32.58 | Unknown function                                                                     |
| Fructose |               | Glyma.16g001000 | 26.6  | Glutamine-rich protein 23                                                            |
| Fructose |               | Glyma.16g001100 | 19.55 | Protein of unknown function (DUF707)                                                 |
| Fructose |               | Glyma.16g001200 | 16.87 | NPK1-related protein kinase 1                                                        |
| Fructose |               | Glyma.16g001300 | 11.16 | Membrane                                                                             |
| Fructose |               | Glyma.16g001400 | 11.23 | Unknown function                                                                     |
| Fructose |               | Glyma.16g001500 | 3.78  | Protein kinase superfamily protein                                                   |

|          |               |                 |       |                                                                 |
|----------|---------------|-----------------|-------|-----------------------------------------------------------------|
| Fructose |               | Glyma.16g001600 | 0.97  | Protein of unknown function (DUF579)                            |
| Fructose |               | Glyma.16g001700 | 0     | Ras-related small GTP-binding family protein                    |
| Fructose |               | Glyma.16g001800 | 3.17  | RAB GTPase 11C                                                  |
| Fructose |               | Glyma.16g001900 | 5.91  | Translation elongation factor ef1b, gamma chain                 |
| Fructose |               | Glyma.16g002000 | 10    | Membrane                                                        |
| Fructose |               | Glyma.16g002100 | 10.81 | Unknown function                                                |
| Fructose |               | Glyma.16g002200 | 14.58 | RNA-binding KH domain-containing protein                        |
| Fructose |               | Glyma.16g002300 | 17.31 | Smg-4/UPF3 family protein                                       |
| Fructose |               | Glyma.16g002400 | 30.37 | Shaggy-like protein kinase 41                                   |
| Fructose |               | Glyma.16g002500 | 38.89 | Chloroplast heat shock protein 70-2                             |
| Fructose |               | Glyma.16g002600 | 42.33 | PB1 domain protein                                              |
| Fructose |               | Glyma.16g002700 | 44.27 | Unknown function                                                |
| Fructose | Gm16_1358677  | Glyma.16g015000 | 43.55 | Leucine-rich receptor-like protein kinase family protein        |
| Fructose |               | Glyma.16g015100 | 28.68 | METALLO PHOSPHOESTERASE RELATED                                 |
| Fructose |               | Glyma.16g015200 | 30.17 | Rotundifolia like 9                                             |
| Fructose |               | Glyma.16g015300 | 20.74 | RNA-binding (RRM/RBD/RNP motifs) family protein                 |
| Fructose |               | Glyma.16g015400 | 1.03  | STRUBBELIG-receptor family 6                                    |
| Fructose |               | Glyma.16g015500 | 1.51  | Regulatory particle triple-A 1A                                 |
| Fructose |               | Glyma.16g015600 | 7.73  | Uncharacterized conserved protein                               |
| Fructose |               | Glyma.16g015700 | 14.88 | ORMDL family protein                                            |
| Fructose |               | Glyma.16g015800 | 24.38 | Uncharacterized conserved protein                               |
| Fructose |               | Glyma.16g015900 | 32.6  | Protein of unknown function (DUF1295)                           |
| Fructose |               | Glyma.16g016000 | 41.38 | Purple acid phosphatase 29                                      |
| Fructose |               | Glyma.16g016100 | 46.22 | Chlorophyll A-B binding protein                                 |
| Fructose | Gm16_31661187 | Glyma.16g155800 | 46.32 | HISTIDINOL PHOSPHATE AMINOTRANSFERASE 1                         |
| Fructose |               | Glyma.16g155900 | 49.68 | Unknown function                                                |
| Fructose |               | Glyma.16g156000 | 40.03 | Unknown function                                                |
| Fructose |               | Glyma.16g156100 | 25.76 | Leucine-rich repeat transmembrane protein kinase family protein |
| Fructose |               | Glyma.16g156200 | 17.55 | Leucine-rich repeat transmembrane protein kinase family protein |
| Fructose |               | Glyma.16g156300 | 10.5  | 5'-3' EXONUCLEASE FAMILY PROTEIN                                |
| Fructose |               | Glyma.16g156400 | 0     | C2H2 and C2HC zinc fingers superfamily protein                  |
| Fructose |               | Glyma.16g156500 | 4.11  | PARALLEL SPINDLE 1 PROTEIN                                      |
| Fructose |               | Glyma.16g156600 | 12    | Transmembrane protein 18                                        |
| Fructose |               | Glyma.16g156700 | 20.21 | GRAS family transcription factor                                |
| Fructose |               | Glyma.16g156800 | 39.14 | SUCROSE TRANSPORT PROTEIN SUC1-RELATED                          |
| Fructose |               | Glyma.16g156900 | 48.43 | SUCROSE TRANSPORT PROTEIN SUC1-RELATED                          |
| Fructose | Gm17_2425050  | Glyma.17g032400 | 33.18 | Binding                                                         |
| Fructose |               | Glyma.17g032500 | 27.96 | Zinc knuckle (CCHC-type) family protein                         |
| Fructose |               | Glyma.17g032600 | 24.29 | Unknown function                                                |
| Fructose |               | Glyma.17g032700 | 21.37 | PROTEIN PET18                                                   |
| Fructose |               | Glyma.17g032800 | 17.26 | Ubiquitin-conjugating enzyme 32                                 |
| Fructose |               | Glyma.17g032900 | 14.49 | INO80 COMPLEX SUBUNIT B                                         |

|          |               |                 |        |                                                                |
|----------|---------------|-----------------|--------|----------------------------------------------------------------|
| Fructose |               | Glyma.17g033000 | 10.06  | Plant protein of unknown function                              |
| Fructose |               | Glyma.17g033100 | 1.13   | Aldehyde dehydrogenase 22A1                                    |
| Fructose |               | Glyma.17g033200 | 0.19   | Nucleic acid-binding proteins                                  |
| Fructose |               | Glyma.17g033300 | 13.5   | Acyl-CoA N-acyltransferases (NAT) superfamily protein          |
| Fructose |               | Glyma.17g033400 | 20.13  | High chlorophyll fluorescent 107                               |
| Fructose |               | Glyma.17g033500 | 27.29  | Plant disease resistance response protein                      |
| Fructose |               | Glyma.17g033600 | 29.45  | ATP-CITRATE LYASE B-1                                          |
| Fructose |               | Glyma.17g033700 | 39.09  | PAS domain-containing protein tyrosine kinase family protein   |
| Fructose | Gm17_3094261  | Glyma.17g041200 | 46.62  | P-glycoprotein 11                                              |
| Fructose |               | Glyma.17g041300 | 20.92  | ATP binding cassette subfamily b4                              |
| Fructose |               | Glyma.17g041400 | 10.81  | P-glycoprotein 11                                              |
| Fructose |               | Glyma.17g041500 | 0      | Hydroxyproline-rich glycoprotein family protein                |
| Fructose |               | Glyma.17g041600 | 3.327  | Diacylglycerol and triacylglycerol biosynthesis                |
| Fructose |               | Glyma.17g041700 | 5.35   | Chromatin remodeling factor18                                  |
| Fructose |               | Glyma.17g041800 | 11.21  | Unknown function                                               |
| Fructose |               | Glyma.17g041900 | 16.47  | Metal ion binding                                              |
| Fructose |               | Glyma.17g042000 | 24.25  | Glutathione S-transferase TAU 25                               |
| Fructose |               | Glyma.17g042100 | 29.15  | Polyubiquitin 10                                               |
| Fructose |               | Glyma.17g042200 | 32.376 | Polyubiquitin 10                                               |
| Fructose |               | Glyma.17g042300 | 40.43  | WRKY family transcription factor                               |
| Fructose | Gm18_949928   | Glyma.18g012700 | 42.09  | P-glycoprotein 18                                              |
| Fructose |               | Glyma.18g012800 | 37.6   | Phloem development                                             |
| Fructose |               | Glyma.18g012900 | 32.25  | Cellulase (glycosyl hydrolase family 5) protein                |
| Fructose |               | Glyma.18g013000 | 28.31  | Embryo defective 1745                                          |
| Fructose |               | Glyma.18g013100 | 23.32  | COPINE (calcium-dependent phospholipid-binding protein) family |
| Fructose |               | Glyma.18g013200 | 16.85  | Mitogen-activated protein kinase phosphatase 1                 |
| Fructose |               | Glyma.18g013300 | 10.43  | Sphere organelles protein-related                              |
| Fructose |               | Glyma.18g013400 | 0      | O-fucosyltransferase family protein                            |
| Fructose |               | Glyma.18g013500 | 1.86   | Melibiose family protein                                       |
| Fructose |               | Glyma.18g013600 | 6.48   | Sulfur E2                                                      |
| Fructose |               | Glyma.18g013700 | 12.77  | Protein of unknown function (DUF707)                           |
| Fructose |               | Glyma.18g013800 | 19.99  | RING/U-box superfamily protein                                 |
| Fructose |               | Glyma.18g013900 | 24.58  | Integral component of membrane                                 |
| Fructose |               | Glyma.18g014000 | 27.23  | Unknown function                                               |
| Fructose |               | Glyma.18g014100 | 32.09  | Beta-1,4-N-acetylglucosaminyltransferase family protein        |
| Fructose | Gm18_55715030 | Glyma.18g274000 | 45.23  | RING/U-box superfamily protein                                 |
| Fructose |               | Glyma.18g274100 | 33.06  | Spindle assembly                                               |
| Fructose |               | Glyma.18g274200 | 30.7   | Pollen Ole e 1 allergen and extensin family protein            |
| Fructose |               | Glyma.18g274300 | 29.93  | Integral component of membrane                                 |
| Fructose |               | Glyma.18g274400 | 26.44  | UDP-glycosyltransferase superfamily protein                    |
| Fructose |               | Glyma.18g274500 | 21.36  | F-box family protein                                           |
| Fructose |               | Glyma.18g274600 | 17.58  | Unknown function                                               |

|          |               |                 |       |                                                                                 |
|----------|---------------|-----------------|-------|---------------------------------------------------------------------------------|
| Fructose |               | Glyma.18g274700 | 14.93 | F-box family protein                                                            |
| Fructose |               | Glyma.18g274800 | 5.63  | F-box family protein                                                            |
| Fructose |               | Glyma.18g274900 | 0.48  | F-box and associated interaction domains-containing protein                     |
| Fructose |               | Glyma.18g275000 | 3.1   | Tetratricopeptide repeat (TPR)-like superfamily protein                         |
| Fructose |               | Glyma.18g275100 | 11.28 | WD40 repeat-like superfamily protein                                            |
| Fructose |               | Glyma.18g275200 | 18.56 | Auxin transport protein (BIG)                                                   |
| Fructose |               | Glyma.18g275300 | 40.59 | O-fucosyltransferase family protein                                             |
| Fructose | Gm19_45790916 | Glyma.19g200500 | 34.42 | Syntaxin of plants 121                                                          |
| Fructose |               | Glyma.19g200600 | 28.48 | DEOXYRIBONUCLEASE TATDN1-RELATED                                                |
| Fructose |               | Glyma.19g200700 | 26.03 | Chloroplast RNA-binding protein 33                                              |
| Fructose |               | Glyma.19g200800 | 19.82 | Nuclear factor Y, subunit A10                                                   |
| Fructose |               | Glyma.19g200900 | 7.75  | Glutaredoxin family protein                                                     |
| Fructose |               | Glyma.19g201000 | 12.72 | Unknown function                                                                |
| Fructose |               | Glyma.19g201100 | 31.49 | Ubiquitin-specific protease 8                                                   |
| Fructose |               | Glyma.19g201200 | 40.88 | Dihydroneopterin aldolase                                                       |
| Fructose | Gm20_58755    | Glyma.20g000300 | 37.34 | Integral component of membrane                                                  |
| Fructose |               | Glyma.20g000400 | 17.84 | Protein arginine methyltransferase 6                                            |
| Fructose |               | Glyma.20g000500 | 12.95 | Peptidase M20/M25/M40 family protein                                            |
| Fructose |               | Glyma.20g000600 | 6.57  | Nuclear factor Y, subunit B6                                                    |
| Fructose |               | Glyma.20g000700 | 3.14  | P-loop containing nucleoside triphosphate hydrolases superfamily protein        |
| Fructose |               | Glyma.20g000800 | 17.69 | DNASE I-LIKE SUPERFAMILY PROTEIN                                                |
| Fructose |               | Glyma.20g000900 | 23.57 | Cyclin j18                                                                      |
| Fructose | Gm20_31554795 | Glyma.20g083900 | 49.54 | Indole-3-acetic acid inducible 33                                               |
| Fructose |               | Glyma.20g084000 | 15.87 | Small nuclear ribonucleoprotein f                                               |
| Fructose |               | Glyma.20g084100 | 33.32 | Calcium-binding tetratricopeptide family protein                                |
| Glucose  | Gm01_38064415 | Glyma.01g112100 | 42.76 | Membrane-associated progesterone binding protein 2                              |
| Glucose  |               | Glyma.01g112200 | 2.33  | Disease resistance protein (TIR-NBS-LRR class) family                           |
| Glucose  |               | Glyma.01g112300 | 7.15  | Disease resistance protein (TIR-NBS-LRR class) family                           |
| Glucose  |               | Glyma.01g112400 | 37.57 | Cytochrome p450, family 94, subfamily b, polypeptide 3                          |
| Glucose  | Gm01_42155458 | None            |       |                                                                                 |
| Glucose  | Gm02_37116580 | Glyma.02g196000 | 49.29 | Malectin/receptor-like protein kinase family protein                            |
| Glucose  |               | Glyma.02g196100 | 2.98  | COBRA-like extracellular glycosyl-phosphatidyl inositol-anchored protein family |
| Glucose  | Gm07_14920947 | Glyma.07g124700 | 52.49 | MATE efflux family protein                                                      |
| Glucose  |               | Glyma.07g124800 | 41.92 | Tetratricopeptide repeat (TPR)-containing protein                               |
| Glucose  |               | Glyma.07g124900 | 30.87 | IQ-domain 26                                                                    |
| Glucose  |               | Glyma.07g125000 | 30.27 | IQ-domain 26                                                                    |
| Glucose  |               | Glyma.07g125100 | 18.28 | Pectin lyase-like superfamily protein                                           |
| Glucose  |               | Glyma.07g125200 | 3.07  | Protein kinase family protein / wd-40 repeat family protein                     |
| Glucose  |               | Glyma.07g125300 | 0     | Nuclear RNA polymerase C2                                                       |
| Glucose  | Gm10_11710604 | Glyma.10g088200 | 24.05 | Cytochrome P450, family 721, subfamily A, polypeptide 1                         |
| Glucose  |               | Glyma.10g088300 | 36.29 | Mitogen-activated protein kinase 3                                              |



|         |               |                 |       |                                                                         |
|---------|---------------|-----------------|-------|-------------------------------------------------------------------------|
| Glucose | Gm10_12143793 | Glyma.10g088400 | 51.3  | Nucleotide/sugar transporter family protein                             |
| Sucrose | Gm02_8379231  | Glyma.10g090600 | 50.1  | Copper amine oxidase family protein                                     |
| Sucrose |               | Glyma.02g093500 | 49.72 | Phospholipase D beta 1                                                  |
| Sucrose |               | Glyma.02g093600 | 27.45 | Binding                                                                 |
| Sucrose |               | Glyma.02g093700 | 7.36  | RNA-binding (RRM/RBD/RNP motifs) family protein                         |
| Sucrose |               | Glyma.02g093800 | 3.88  | RNA binding                                                             |
| Sucrose |               | Glyma.02g093900 | 23.64 | WUSCHEL related homeobox 13                                             |
| Sucrose |               | Glyma.02g094000 | 27.4  | Basic helix-loop-helix (bHLH) DNA-binding superfamily protein           |
| Sucrose | Gm02_40701593 | Glyma.02g218600 | 42.92 | Sucrose transporter and related proteins                                |
| Sucrose |               | Glyma.02g218700 | 30.19 | NAD-dependent glycerol-3-phosphate dehydrogenase family protein         |
| Sucrose |               | Glyma.02g218800 | 16.9  | Cation/H <sup>+</sup> exchanger 3                                       |
| Sucrose |               | Glyma.02g218900 | 5.81  | Rhodanese/Cell cycle control phosphatase superfamily protein            |
| Sucrose |               | Glyma.02g219000 | 1.25  | Pentatricopeptide repeat (PPR-like) superfamily protein                 |
| Sucrose |               | Glyma.02g219100 | 0.09  | Unknown function                                                        |
| Sucrose |               | Glyma.02g219200 | 0.61  | RING-FINGER, DEAD-LIKE HELICASE, PHD AND SNF2 DOMAIN-CONTAINING PROTEIN |
| Sucrose |               | Glyma.02g219300 | 17.51 | Protein kinase superfamily protein                                      |
| Sucrose |               | Glyma.02g219400 | 28.63 | Protein of unknown function (DUF3133)                                   |
| Sucrose | Gm03_36427644 | Glyma.03g148300 | 28.1  | Alpha/beta-hydrolases superfamily protein                               |
| Sucrose |               | Glyma.03g148400 | 5.2   | Tetratricopeptide repeat (TPR)-like superfamily protein                 |
| Sucrose |               | Glyma.03g148500 | 0     | RNI-like superfamily protein                                            |
| Sucrose |               | Glyma.03g148600 | 3.4   | Histidine-containing phosphotransfer factor 5                           |
| Sucrose |               | Glyma.03g148700 | 6.17  | Homolog of yeast autophagy 18 (ATG18) g                                 |
| Sucrose |               | Glyma.03g148800 | 15.05 | Protein kinase family protein                                           |
| Sucrose |               | Glyma.03g148900 | 21.66 | Unknown function                                                        |
| Sucrose |               | Glyma.03g149000 | 26.46 | Receptor-like kinase in in flowers 3                                    |
| Sucrose |               | Glyma.03g149100 | 33.96 | Receptor-like kinase in in flowers 3                                    |
| Sucrose |               | Glyma.03g149200 | 37.22 | Major facilitator superfamily protein                                   |
| Sucrose |               | Glyma.03g149300 | 45.51 | SUGAR TRANSPORTER ERD6-LIKE 7                                           |
| Sucrose | Gm06_14414191 | Glyma.06g171700 | 42.97 | Leucine-rich repeat protein kinase family protein                       |
| Sucrose |               | Glyma.06g171800 | 30.55 | Adenylate kinase family protein                                         |
| Sucrose |               | Glyma.06g171900 | 17.16 | Amp-dependent synthetase and ligase family protein                      |
| Sucrose |               | Glyma.06g172000 | 6.18  | Zn-dependent exopeptidases superfamily protein                          |
| Sucrose |               | Glyma.06g172100 | 1.55  | CGI-121 family member                                                   |
| Sucrose |               | Glyma.06g172200 | 6.04  | Unknown function                                                        |
| Sucrose |               | Glyma.06g172300 | 15.5  | Nuclear protein X1                                                      |
| Sucrose |               | Glyma.06g172400 | 21.44 | Nucleic acid-binding, OB-fold-like protein                              |
| Sucrose |               | Glyma.06g172500 | 32.43 | Unknown function                                                        |
| Sucrose | Gm06_15825296 | Glyma.06g183300 | 49.11 | Zinc/RING finger domain                                                 |
| Sucrose |               | Glyma.06g183400 | 42.78 | Polygalacturonase 2                                                     |
| Sucrose |               | Glyma.06g183500 | 3.62  | Protein kinase superfamily protein                                      |

|         |               |                 |       |                                                                                          |
|---------|---------------|-----------------|-------|------------------------------------------------------------------------------------------|
| Sucrose |               | Glyma.06g183600 | 17.13 | RING/U-box superfamily protein                                                           |
| Sucrose |               | Glyma.06g183700 | 22.41 | Deletion of SUV3 suppressor 1(i)                                                         |
| Sucrose |               | Glyma.06g183800 | 29.46 | ARM repeat superfamily protein                                                           |
| Sucrose | Gm07_7692973  | Glyma.07g083100 | 40.42 | Wd-40 repeat family protein / beige-related                                              |
| Sucrose |               | Glyma.07g083200 | 24.83 | Cytochrome p450, family 704, subfamily a, polypeptide 2                                  |
| Sucrose |               | Glyma.07g083300 | 16.21 | Cytochrome p450, family 704, subfamily a, polypeptide 2                                  |
| Sucrose |               | Glyma.07g083400 | 0     | Cytochrome p450, family 704, subfamily a, polypeptide 2                                  |
| Sucrose |               | Glyma.07g083500 | 23.59 | Basic helix-loop-helix (BHLH) DNA-binding superfamily protein                            |
| Sucrose |               | Glyma.07g083600 | 30.97 | Integral component of membrane                                                           |
| Sucrose |               | Glyma.07g083700 | 35.68 | Phosphorylase superfamily protein                                                        |
| Sucrose | Gm07_15235896 | Glyma.07g126800 | 44.19 | CCCH-type zinc finger family protein                                                     |
| Sucrose |               | Glyma.07g126900 | 20.08 | MYB domain protein 68                                                                    |
| Sucrose |               | Glyma.07g127000 | 16.16 | SNF7 family protein                                                                      |
| Sucrose |               | Glyma.07g127100 | 4.08  | Root hair specific 16                                                                    |
| Sucrose |               | Glyma.07g127200 | 19.94 | Arabinogalactan protein 20                                                               |
| Sucrose |               | Glyma.07g127300 | 22.49 | SNF7 family protein                                                                      |
| Sucrose |               | Glyma.07g127400 | 28.73 | Tetratricopeptide repeat (TPR)-like superfamily protein                                  |
| Sucrose |               | Glyma.07g127500 | 31.07 | Ribosomal protein l31e family protein                                                    |
| Sucrose |               | Glyma.07g127600 | 33.03 | Deoxyhypusine synthase                                                                   |
| Sucrose |               | Glyma.07g127700 | 37.82 | Caffeoyl-CoA 3-O-methyltransferase                                                       |
| Sucrose | Gm07_34157286 | Glyma.07g178300 | 9.52  | Cupredoxin superfamily protein                                                           |
| Sucrose |               | Glyma.07g178400 | 16.41 | ARM repeat superfamily protein                                                           |
| Sucrose |               | Glyma.07g178500 | 45.7  | Homeodomain-like superfamily protein                                                     |
| Sucrose | Gm08_20126261 | Glyma.08g236900 | 36.46 | S-locus lectin protein kinase family protein                                             |
| Sucrose |               | Glyma.08g237000 | 17.79 | P-loop containing nucleoside triphosphate hydrolases superfamily protein                 |
| Sucrose |               | Glyma.08g237100 | 10.83 | Protein kinase superfamily protein with octicosapeptide/phox/bem1p domain                |
| Sucrose |               | Glyma.08g237200 | 13.76 | Protein kinase superfamily protein with octicosapeptide/phox/bem1p domain                |
| Sucrose |               | Glyma.08g237300 | 29.44 | RGA-like 1                                                                               |
| Sucrose | Gm09_3173391  | Glyma.09g037400 | 36.14 | DNA-DIRECTED RNA POLYMERASE                                                              |
| Sucrose |               | Glyma.09g037500 | 28.32 | Unknown function                                                                         |
| Sucrose |               | Glyma.09g037600 | 25.92 | Unknown function                                                                         |
| Sucrose |               | Glyma.09g037700 | 20.97 | Integral component of membrane                                                           |
| Sucrose |               | Glyma.09g037800 | 12.09 | Mitochondrial import inner membrane translocase subunit TIM17/TIM22/TIM23 family protein |
| Sucrose |               | Glyma.09g037900 | 0     | Protein predicted to be involved in carbohydrate metabolism                              |
| Sucrose |               | Glyma.09g038000 | 5.94  | Dihydrolipoyl dehydrogenases                                                             |
| Sucrose |               | Glyma.09g038100 | 12.84 | Ribosomal l29e protein family                                                            |
| Sucrose |               | Glyma.09g038200 | 19.84 | Secretion-associated RAs super family 2                                                  |
| Sucrose | Gm11_18321103 | Glyma.11g170600 | 52.3  | Serine carboxypeptidase-like 40                                                          |

|         |               |                 |       |                                                                            |
|---------|---------------|-----------------|-------|----------------------------------------------------------------------------|
| Sucrose |               | Glyma.11g170700 | 0     | Cleavage and polyadenylation specificity factor 100                        |
| Sucrose |               | Glyma.11g170800 | 21.9  | Unknown function                                                           |
| Sucrose |               | Glyma.11g170900 | 24.28 | PHD finger transcription factor, putative                                  |
| Sucrose |               | Glyma.11g171000 | 30.14 | Actin cytoskeleton organization                                            |
| Sucrose | Gm11_29223742 | Glyma.11g206600 | 42.28 | HAT dimerisation domain-containing protein                                 |
| Sucrose |               | Glyma.11g206700 | 28.95 | cysteine-rich RLK (RECEPTOR-like protein kinase) 2                         |
| Sucrose |               | Glyma.11g206800 | 5.47  | Ribosomal protein 5A                                                       |
| Sucrose | Gm12_34184311 | Glyma.12g180800 | 39.8  | DNA/RNA helicase protein                                                   |
| Sucrose |               | Glyma.12g180900 | 33.25 | Transmembrane amino acid transporter family protein                        |
| Sucrose |               | Glyma.12g181000 | 24.89 | Transmembrane amino acid transporter family protein                        |
| Sucrose |               | Glyma.12g181100 | 16.92 | Transmembrane amino acid transporter family protein                        |
| Sucrose |               | Glyma.12g181200 | 0     | Unknown function                                                           |
| Sucrose |               | Glyma.12g181300 | 3.58  | Zinc finger C-X8-C-X5-C-X3-H type family protein                           |
| Sucrose |               | Glyma.12g181400 | 9.05  | Histone deacetylase 2C                                                     |
| Sucrose |               | Glyma.12g181500 | 13.76 | Unknown function                                                           |
| Sucrose |               | Glyma.12g181600 | 32.07 | MORN (Membrane Occupation and Recognition Nexus) repeat-containing protein |
| Sucrose | Gm15_49568824 | Glyma.15g262500 | 41.77 | Cysteine synthase D1                                                       |
| Sucrose |               | Glyma.15g262600 | 34.08 | Uncharacterized conserved protein (DUF2358)                                |
| Sucrose |               | Glyma.15g262700 | 16.49 | Photosystem ii reaction center protein t                                   |
| Sucrose |               | Glyma.15g262800 | 8.07  | Zinc transporter 1 precursor                                               |
| Sucrose |               | Glyma.15g262900 | 4.48  | Zinc knuckle (CCHC-type) family protein                                    |
| Sucrose |               | Glyma.15g263000 | 13.25 | Carbohydrate-binding X8 domain superfamily protein                         |
| Sucrose |               | Glyma.15g263100 | 26.6  | Aldolase-type TIM barrel family protein                                    |
| Sucrose | Gm18_7655919  | Glyma.18g079200 | 45.15 | Zinc knuckle                                                               |
| Sucrose |               | Glyma.18g079300 | 42.48 | Cytochrome b561/ferric reductase transmembrane with DOMON related domain   |
| Sucrose |               | Glyma.18g079400 | 23.48 | Agnet domain-containing protein                                            |
| Sucrose |               | Glyma.18g079500 | 20.94 | Auxin-responsive family protein                                            |
| Sucrose |               | Glyma.18g079600 | 15.99 | Multidrug resistance-associated protein 3                                  |
| Sucrose |               | Glyma.18g079700 | 13.04 | Multidrug resistance-associated protein 3                                  |
| Sucrose |               | Glyma.18g079800 | 5.95  | AP2/B3-like transcriptional factor family protein                          |
| Sucrose |               | Glyma.18g079900 | 0     | Ribosomal protein s10p/s20e family protein                                 |
| Sucrose |               | Glyma.18g080000 | 8.83  | Serine acetyltransferase 2;2                                               |
| Sucrose |               | Glyma.18g080100 | 18.53 | Cytochrome P450, family 71, subfamily B, polypeptide 24                    |
| Sucrose | Gm18_56084992 | Glyma.18g279200 | 51.45 | DNA-directed RNA polymerases                                               |
| Sucrose |               | Glyma.18g279300 | 49.76 | Late embryogenesis abundant protein (LEA) family protein                   |
| Sucrose |               | Glyma.18g279400 | 43.20 | Cofactor-independent phosphoglycerate mutase                               |
| Sucrose |               | Glyma.18g279500 | 32.54 | CDC27 family protein                                                       |
| Sucrose |               | Glyma.18g279600 | 23.96 | Unknown function                                                           |
| Sucrose |               | Glyma.18g279700 | 18.91 | Unknown function                                                           |
| Sucrose |               | Glyma.18g279800 | 5.63  | Trichome birefringence-like 19                                             |
| Sucrose |               | Glyma.18g279900 | 0     | Trichome birefringence-like 19                                             |
| Sucrose |               | Glyma.18g280000 | 8.04  | Unknown function                                                           |

|           |               |                 |       |                                                                                      |
|-----------|---------------|-----------------|-------|--------------------------------------------------------------------------------------|
| Sucrose   |               | Glyma.18g280100 | 9.75  | Integral component of membrane                                                       |
| Sucrose   |               | Glyma.18g280200 | 15.69 | Protein kinase superfamily protein                                                   |
| Sucrose   |               | Glyma.18g280300 | 25.85 | Cysteine proteinases superfamily protein                                             |
| Sucrose   |               | Glyma.18g280400 | 37.91 | NB-ARC domain-containing disease resistance protein                                  |
| Sucrose   |               | Glyma.18g280500 | 43.1  | Little nuclei1                                                                       |
| Sucrose   | Gm20_47044176 | Glyma.20g238100 | 44    | Protein phosphatase 2c family protein                                                |
| Sucrose   |               | Glyma.20g238200 | 46.85 | Unknown function                                                                     |
| Sucrose   |               | Glyma.20g238300 | 42.81 | Unknown function                                                                     |
| Sucrose   |               | Glyma.20g238400 | 22.96 | Topless-related 3                                                                    |
| Sucrose   |               | Glyma.20g238500 | 17.2  | PRP38 family protein                                                                 |
| Sucrose   |               | Glyma.20g238600 | 11.29 | Mitochondrially targeted single-stranded DNA binding protein                         |
| Sucrose   |               | Glyma.20g238700 | 5.7   | Protein phosphatase 2C family protein                                                |
| Sucrose   |               | Glyma.20g238800 | 4.52  | Zinc finger (C3HC4-type RING finger) family protein / BRCT domain-containing protein |
| Sucrose   |               | Glyma.20g238900 | 9.59  | Phosphoglycerate mutase family protein                                               |
| Sucrose   |               | Glyma.20g239000 | 11.63 | Drought-responsive family protein                                                    |
| Sucrose   |               | Glyma.20g239100 | 15.04 | Syntaxin of plants 43                                                                |
| Raffinose | Gm01_35419697 | Glyma.01g105000 | 22.64 | Major facilitator superfamily protein                                                |
| Raffinose | Gm01_50576284 | Glyma.01g167600 | 48.17 | Unknown function                                                                     |
| Raffinose |               | Glyma.01g167700 | 44.51 | Integral component of membrane                                                       |
| Raffinose |               | Glyma.01g167800 | 44.54 | Integral component of membrane                                                       |
| Raffinose |               | Glyma.01g167900 | 34.95 | Vascular related NAC-domain protein 1                                                |
| Raffinose |               | Glyma.01g168000 | 9.42  | V-TYPE PROTON ATPASE PROTEOLIPID SUBUNIT                                             |
| Raffinose |               | Glyma.01g168100 | 0.2   | Leucine-rich receptor-like protein kinase family protein                             |
| Raffinose |               | Glyma.01g168200 | 6.53  | ATP binding microtubule motor family protein                                         |
| Raffinose |               | Glyma.01g168300 | 23.62 | Unknown function                                                                     |
| Raffinose |               | Glyma.01g168400 | 29.39 | Lactoylglutathione lyase / glyoxalase I family protein                               |
| Raffinose |               | Glyma.01g168500 | 33.28 | B-box type zinc finger family protein                                                |
| Raffinose |               | Glyma.01g168600 | 44.42 | UPF0183                                                                              |
| Raffinose | Gm02_9220693  | Glyma.02g098800 | 48.79 | MYB-like transcription factor family protein                                         |
| Raffinose |               | Glyma.02g098900 | 43.57 | Unknown function                                                                     |
| Raffinose |               | Glyma.02g099000 | 24.81 | Rotundifolia like 21                                                                 |
| Raffinose |               | Glyma.02g099100 | 0     | Rotundifolia like 21                                                                 |
| Raffinose |               | Glyma.02g099200 | 36.37 | Allene oxide cyclase 4                                                               |
| Raffinose |               | Glyma.02g099300 | 39.23 | Methionine aminopeptidase 1b                                                         |
| Raffinose | Gm02_9675440  | Glyma.02g101700 | 33.17 | SCD6 PROTEIN-RELATED                                                                 |
| Raffinose |               | Glyma.02g101800 | 20.41 | Nuclear matrix constituent protein-related                                           |
| Raffinose |               | Glyma.02g101900 | 14.62 | Leucine-rich repeat (LRR) family protein                                             |
| Raffinose |               | Glyma.02g102000 | 1.68  | Tetratricopeptide repeat (TPR)-like superfamily protein                              |
| Raffinose |               | Glyma.02g102100 | 0     | Unknown function                                                                     |
| Raffinose |               | Glyma.02g102200 | 0.46  | Unknown function                                                                     |
| Raffinose |               | Glyma.02g102300 | 7.97  | Protein of unknown function (DUF3148)                                                |
| Raffinose |               | Glyma.02g102400 | 11.63 | Thioredoxin superfamily protein                                                      |

|           |               |                 |       |                                                                                         |
|-----------|---------------|-----------------|-------|-----------------------------------------------------------------------------------------|
| Raffinose |               | Glyma.02g102500 | 31.16 | Putative endonuclease or glycosyl hydrolase                                             |
| Raffinose |               | Glyma.02g102600 | 35.12 | Protein kinase superfamily protein                                                      |
| Raffinose |               | Glyma.02g102700 | 47.55 | PLC-like phosphodiesterases superfamily protein                                         |
| Raffinose | Gm04_7246268  | Glyma.04g084900 | 45.01 | GATA transcription factor 9                                                             |
| Raffinose |               | Glyma.04g085000 | 13.27 | Homeobox gene 8                                                                         |
| Raffinose |               | Glyma.04g085100 | 10.57 | Unknown function                                                                        |
| Raffinose |               | Glyma.04g085200 | 1.89  | Leucine-rich receptor-like protein kinase family protein                                |
| Raffinose |               | Glyma.04g085300 | 20.44 | Protein of unknown function (DUF1677)                                                   |
| Raffinose |               | Glyma.04g085400 | 28.05 | Protein of unknown function (DUF1677)                                                   |
| Raffinose |               | Glyma.04g085500 | 46.07 | Alpha/beta-hydrolases superfamily protein                                               |
| Raffinose | Gm05_317349   | Glyma.05g003600 | 29.08 | GPI transamidase component family protein / Gaa1-like family protein                    |
| Raffinose |               | Glyma.05g003700 | 25.13 | Unknown function                                                                        |
| Raffinose |               | Glyma.05g003800 | 16.38 | Core-2/I-branching beta-1,6-N-acetylglucosaminyltransferase family protein              |
| Raffinose |               | Glyma.05g003900 | 5.25  | Raffinose synthase family protein                                                       |
| Raffinose |               | Glyma.05g004000 | 2.53  | Protein of unknown function (DUF1421)                                                   |
| Raffinose |               | Glyma.05g004100 | 8.85  | Zinc finger (CCCH-type) family protein / RNA recognition motif (RRM)-containing protein |
| Raffinose |               | Glyma.05g004200 | 25.8  | Pentatricopeptide repeat (PPR) superfamily protein                                      |
| Raffinose |               | Glyma.05g004300 | 32.11 | Oleosin family protein                                                                  |
| Raffinose | Gm06_14414191 | Glyma.06g171600 | 50.13 | Argininosuccinate synthase activity                                                     |
| Raffinose |               | Glyma.06g171700 | 42.97 | Leucine-rich repeat protein kinase family protein                                       |
| Raffinose |               | Glyma.06g171800 | 30.55 | Adenylate kinase family protein                                                         |
| Raffinose |               | Glyma.06g171900 | 17.16 | Amp-dependent synthetase and ligase family protein                                      |
| Raffinose |               | Glyma.06g172000 | 6.18  | Zn-dependent exopeptidases superfamily protein                                          |
| Raffinose |               | Glyma.06g172100 | 1.55  | Kinase binding protein CGI-121                                                          |
| Raffinose |               | Glyma.06g172200 | 6.04  | Unknown function                                                                        |
| Raffinose |               | Glyma.06g172300 | 15.5  | Nuclear protein X1                                                                      |
| Raffinose |               | Glyma.06g172400 | 21.44 | Nucleic acid-binding, OB-fold-like protein                                              |
| Raffinose | Gm11_11311013 | Glyma.11g146000 | 44.73 | SAND family protein                                                                     |
| Raffinose |               | Glyma.11g146100 | 44.73 | NADH-Ubiquinone/plastoquinone (complex I) protein                                       |
| Raffinose |               | Glyma.11g146200 | 37.62 | Protein of unknown function, DUF584                                                     |
| Raffinose |               | Glyma.11g146300 | 21.54 | Ribosomal protein L11 family protein                                                    |
| Raffinose |               | Glyma.11g146400 | 11.94 | Unknown function                                                                        |
| Raffinose |               | Glyma.11g146500 | 8     | Plasma membrane intrinsic protein 2;4                                                   |
| Raffinose |               | Glyma.11g146600 | 1.94  | Integral component of membrane                                                          |
| Raffinose |               | Glyma.11g146700 | 0     | Unknown function                                                                        |
| Raffinose |               | Glyma.11g146800 | 2.81  | PDI-like 1-4                                                                            |
| Raffinose |               | Glyma.11g146900 | 10.65 | Proline-rich family protein                                                             |
| Raffinose |               | Glyma.11g147000 | 19.05 | DHBP synthase RibB-like alpha/beta domain                                               |
| Raffinose |               | Glyma.11g147100 | 28.5  | RING/U-box superfamily protein                                                          |
| Raffinose |               | Glyma.11g147200 | 40.86 | Zinc finger (CCCH-type) family protein                                                  |
| Raffinose | Gm14_43573428 | Glyma.14g176500 | 36.98 | EXORDIUM like 2                                                                         |

|           |               |                 |       |                                                                                          |
|-----------|---------------|-----------------|-------|------------------------------------------------------------------------------------------|
| Raffinose |               | Glyma.14g176600 | 31.85 | Class-II DAHP synthetase family protein                                                  |
| Raffinose |               | Glyma.14g176700 | 4.88  | Protein kinase superfamily protein                                                       |
| Raffinose |               | Glyma.14g176800 | 36.52 | Protein of unknown function (DUF1637)                                                    |
| Raffinose | Gm15_741109   | Glyma.15g008600 | 50.83 | Integrase-type DNA-binding superfamily protein                                           |
| Raffinose |               | Glyma.15g008700 | 43.26 | Snare-like superfamily protein                                                           |
| Raffinose |               | Glyma.15g008800 | 39.81 | Embryo-specific protein 3, (ATS3)                                                        |
| Raffinose |               | Glyma.15g008900 | 32.27 | Pectin lyase-like superfamily protein                                                    |
| Raffinose |               | Glyma.15g009000 | 29.81 | Rhomboid-like protein 5                                                                  |
| Raffinose |               | Glyma.15g009100 | 28.01 | Putative thiol-disulphide oxidoreductase dcc                                             |
| Raffinose |               | Glyma.15g009200 | 19.73 | Peptidase S24/S26A/S26B/S26C family protein                                              |
| Raffinose |               | Glyma.15g009300 | 13.82 | Pentatricopeptide repeat (PPR) superfamily protein                                       |
| Raffinose |               | Glyma.15g009400 | 5.28  | Alba DNA/RNA-binding protein                                                             |
| Raffinose |               | Glyma.15g009500 | 1.3   | Lactoylglutathione lyase / glyoxalase i family protein                                   |
| Raffinose |               | Glyma.15g009600 | 1.98  | Unknown function                                                                         |
| Raffinose |               | Glyma.15g009700 | 10.65 | Peptide deformylase 1A                                                                   |
| Raffinose |               | Glyma.15g009800 | 12.66 | Pectin lyase-like superfamily protein                                                    |
| Raffinose |               | Glyma.15g009900 | 19.23 | Unknown function                                                                         |
| Raffinose |               | Glyma.15g010000 | 26.23 | Nucleoporin interacting component (nup93/nic96-like) family protein                      |
| Raffinose |               | Glyma.15g010100 | 38    | ASPARTATE-GLUTAMATE RACEMASE-LIKE PROTEIN                                                |
| Raffinose |               | Glyma.15g010200 | 45.12 | Unknown function                                                                         |
| Raffinose | Gm15_11667788 | Glyma.15g142200 | 49.62 | Unknown function                                                                         |
| Raffinose |               | Glyma.15g142300 | 42.57 | Unknown function                                                                         |
| Raffinose |               | Glyma.15g142400 | 16.24 | Glycosyl hydrolase superfamily protein                                                   |
| Raffinose |               | Glyma.15g142500 | 10.87 | Glycosyl hydrolase superfamily protein                                                   |
| Raffinose |               | Glyma.15g142600 | 0     | WD40/YVTN repeat-like-containing domain                                                  |
| Raffinose |               | Glyma.15g142700 | 30.11 | DNA-DIRECTED RNA POLYMERASE                                                              |
| Raffinose |               | Glyma.15g142800 | 38.47 | Unknown function                                                                         |
| Raffinose |               | Glyma.15g142900 | 42.51 | Mitochondrial import inner membrane translocase subunit TIM17/TIM22/TIM23 family protein |
| Stachyose | Gm01_1675532  | Glyma.01g017000 | 51.16 | Tetratricopeptide repeat (TPR)-like superfamily protein                                  |
| Stachyose |               | Glyma.01g017100 | 38.07 | NAD(P)-binding rossmann-fold superfamily protein                                         |
| Stachyose |               | Glyma.01g017200 | 31.80 | RING/U-box superfamily protein                                                           |
| Stachyose |               | Glyma.01g017300 | 25.41 | RING/U-box superfamily protein                                                           |
| Stachyose |               | Glyma.01g017400 | 18.39 | RNA-binding (RRM/RBD/RNP motifs) family protein                                          |
| Stachyose |               | Glyma.01g017500 | 11.61 | Tetraspanin family protein                                                               |
| Stachyose |               | Glyma.01g017600 | 1.11  | Tetraspanin2                                                                             |
| Stachyose |               | Glyma.01g017700 | 13.49 | PLATZ transcription factor family protein                                                |
| Stachyose | Gm01_50504115 | Glyma.01g166800 | 33.08 | Homeodomain-like superfamily protein                                                     |
| Stachyose |               | Glyma.01g166900 | 21.25 | Unknown function                                                                         |
| Stachyose |               | Glyma.01g167000 | 7.95  | SAUR-like auxin-responsive protein family                                                |
| Stachyose |               | Glyma.01g167100 | 5.06  | Unknown Function                                                                         |
| Stachyose |               | Glyma.01g167200 | 0     | Plant protein of unknown function (DUF869)                                               |

|           |               |                 |       |                                                                                             |
|-----------|---------------|-----------------|-------|---------------------------------------------------------------------------------------------|
| Stachyose |               | Glyma.01g167300 | 4.93  | Ribosomal protein l2 family                                                                 |
| Stachyose |               | Glyma.01g167400 | 8.07  | Zinc finger C-x8-C-x5-C-x3-H type family protein                                            |
| Stachyose |               | Glyma.01g167500 | 17.75 | NAD(P)-binding Rossmann-fold superfamily protein                                            |
| Stachyose |               | Glyma.01g167600 | 20.04 | Unknown function                                                                            |
| Stachyose |               | Glyma.01g167700 | 26.12 | Integral component of membrane                                                              |
| Stachyose |               | Glyma.01g167800 | 27.4  | Integral component of membrane                                                              |
| Stachyose |               | Glyma.01g167900 | 32.18 | Vascular related NAC-domain protein 1                                                       |
| Stachyose | Gm02_7204486  | Glyma.02g082200 | 52.16 | RAD3-like DNA-binding helicase protein                                                      |
| Stachyose |               | Glyma.02g082300 | 46.52 | Small nuclear ribonucleoprotein family protein                                              |
| Stachyose |               | Glyma.02g082400 | 42.22 | Leucine-rich repeat transmembrane protein kinase                                            |
| Stachyose |               | Glyma.02g082500 | 35.31 | Vacuolar iron transporter (VIT) family protein                                              |
| Stachyose |               | Glyma.02g082600 | 18.1  | Uncharacterized conserved protein                                                           |
| Stachyose |               | Glyma.02g082700 | 10.41 | Pyridoxal phosphate (PLP)-dependent transferases superfamily protein                        |
| Stachyose |               | Glyma.02g082800 | 2.62  | VIRE2-interacting protein 1                                                                 |
| Stachyose |               | Glyma.02g082900 | 16.82 | VIRE2-interacting protein 1                                                                 |
| Stachyose |               | Glyma.02g083000 | 21.84 | Cytochrome P450, family 707, subfamily A, polypeptide 3                                     |
| Stachyose |               | Glyma.02g083100 | 28.07 | Vire2-interacting protein 1/basic-leucine zipper (bzip) transcription factor family protein |
| Stachyose |               | Glyma.02g083200 | 36.26 | Cytochrome p450, family 707, subfamily a, polypeptide 3                                     |
| Stachyose |               | Glyma.02g083300 | 40.37 | Receptor like protein 6                                                                     |
| Stachyose |               | Glyma.02g083400 | 42.66 | F-box family protein                                                                        |
| Stachyose | Gm03_212961   | Glyma.03g001400 | 47.43 | RNA-binding KH domain-containing protein                                                    |
| Stachyose |               | Glyma.03g001500 | 40.23 | HAD superfamily, subfamily IIIB acid phosphatase                                            |
| Stachyose |               | Glyma.03g001600 | 35.57 | HAD superfamily, subfamily IIIB acid phosphatase                                            |
| Stachyose |               | Glyma.03g001700 | 21.92 | Unknown function                                                                            |
| Stachyose |               | Glyma.03g001800 | 9.73  | Thioredoxin H-type 9                                                                        |
| Stachyose |               | Glyma.03g001900 | 6.96  | TBP-associated factor 11                                                                    |
| Stachyose |               | Glyma.03g002000 | 3.04  | Alpha-galactosidase 1                                                                       |
| Stachyose |               | Glyma.03g002100 | 0     | Glycosyl hydrolase superfamily protein                                                      |
| Stachyose |               | Glyma.03g002200 | 1.67  | Protein kinase superfamily protein                                                          |
| Stachyose |               | Glyma.03g002300 | 12.29 | WRKY DNA-binding protein 67                                                                 |
| Stachyose |               | Glyma.03g002400 | 21.25 | Translation initiation factor 3b1                                                           |
| Stachyose |               | Glyma.03g002500 | 26.51 | 3beta-hydroxysteroid-dehydrogenase/decarboxylase isoform 2                                  |
| Stachyose |               | Glyma.03g002600 | 39.7  | Ubiquitin carboxyl-terminal hydrolase family protein                                        |
| Stachyose |               | Glyma.03g002700 | 44.87 | S-locus lectin protein kinase family protein                                                |
| Stachyose | Gm06_44669377 | Glyma.06g260800 | 39.7  | Ubiquitin carboxyl-terminal hydrolase family protein                                        |
| Stachyose |               | Glyma.06g260900 | 26.95 | Auxin-responsive GH3 family protein                                                         |
| Stachyose |               | Glyma.06g261000 | 3.64  | S-locus lectin protein kinase family protein                                                |
| Stachyose | Gm07_2535137  | Glyma.07g031400 | 10.78 | S-locus lectin protein kinase family protein                                                |
| Stachyose |               | Glyma.07g031500 | 42.51 | DEAD/DEAH box RNA helicase family protein                                                   |
| Stachyose |               | Glyma.07g031600 | 36.4  | O-fucosyltransferase family protein                                                         |
| Stachyose |               | Glyma.07g031700 | 32.55 | Alba DNA/RNA-binding protein                                                                |

|           |               |                 |       |                                                                           |
|-----------|---------------|-----------------|-------|---------------------------------------------------------------------------|
| Stachyose |               | Glyma.07g031800 | 24.91 | Lactoylglutathione lyase / glyoxalase i family protein                    |
| Stachyose |               | Glyma.07g031900 | 21.36 | Cotton fibre expressed protein                                            |
| Stachyose |               | Glyma.07g032000 | 14.2  | Unknown function                                                          |
| Stachyose |               | Glyma.07g032100 | 11.47 | Galactose oxidase/kelch repeat superfamily protein                        |
| Stachyose |               | Glyma.07g032200 | 6.6   | Integral component of membrane                                            |
| Stachyose |               | Glyma.07g032300 | 1.9   | Aconitase/3-isopropylmalate dehydratase protein                           |
| Stachyose |               | Glyma.07g032400 | 3     | Ran BP2/NZF zinc finger-like superfamily protein                          |
| Stachyose |               | Glyma.07g032500 | 11.69 | Late embryogenesis abundant protein (LEA) family protein                  |
| Stachyose |               | Glyma.07g032600 | 13.26 | WD40 repeat-containing protein                                            |
| Stachyose |               | Glyma.07g032700 | 19.69 | Glutaredoxin 4                                                            |
| Stachyose |               | Glyma.07g032800 | 22.26 | Alpha/beta-hydrolases superfamily protein                                 |
| Stachyose | Gm09_41499208 | Glyma.09g189700 | 32.66 | Rubredoxin-like superfamily protein                                       |
| Stachyose |               | Glyma.09g189800 | 51.11 | Arabinogalactan protein 22                                                |
| Stachyose |               | Glyma.09g189900 | 47.15 | Serine-rich protein-related                                               |
| Stachyose |               | Glyma.09g190000 | 43.25 | Late embryogenesis abundant (LEA) hydroxyproline-rich glycoprotein family |
| Stachyose |               | Glyma.09g190100 | 39.63 | Unknown function                                                          |
| Stachyose |               | Glyma.09g190200 | 29.85 | Protein of unknown function (DUF1674)                                     |
| Stachyose |               | Glyma.09g190300 | 26.18 | Integral component of membrane                                            |
| Stachyose |               | Glyma.09g190400 | 17.28 | Unknown function                                                          |
| Stachyose |               | Glyma.09g190500 | 9.68  | Regulator of vps4 activity in the MVB pathway protein                     |
| Stachyose |               | Glyma.09g190600 | 0     | ATP binding microtubule motor family protein                              |
| Stachyose |               | Glyma.09g190700 | 11.75 | Heat shock transcription factor C1                                        |
| Stachyose | Gm12_35531777 | Glyma.12g193300 | 42.57 | Flavin-binding monooxygenase family protein                               |
| Stachyose |               | Glyma.12g193400 | 49.44 | MYB domain protein 101                                                    |
| Stachyose |               | Glyma.12g193500 | 40.16 | Zinc-binding dehydrogenase family protein                                 |
| Stachyose |               | Glyma.12g193600 | 27.94 | Alkenal reductase                                                         |
| Stachyose |               | Glyma.12g193700 | 14.18 | Galactosyltransferase family protein                                      |
| Stachyose |               | Glyma.12g193800 | 12    | Unknown function                                                          |
| Stachyose |               | Glyma.12g193900 | 19.81 | Aconitase 3                                                               |
| Stachyose |               | Glyma.12g194000 | 29.58 | Unknown function                                                          |
| Stachyose |               | Glyma.12g194100 | 35.45 | MATE efflux family protein                                                |
| Stachyose | Gm12_39385435 | Glyma.12g234100 | 46.18 | GLUTAMATE RECEPTOR 5                                                      |
| Stachyose |               | Glyma.12g234200 | 23.04 | Unknown function                                                          |
| Stachyose |               | Glyma.12g234300 | 16.14 | Trehalose-6-phosphate synthase                                            |
| Stachyose |               | Glyma.12g234400 | 3.08  | Rhamnose biosynthesis 1                                                   |
| Stachyose |               | Glyma.12g234500 | 4.28  | Unknown function                                                          |
| Stachyose |               | Glyma.12g234600 | 8.62  | Nodulin mtn3 family protein                                               |
| Stachyose |               | Glyma.12g234700 | 14.91 | Sodium bile acid symporter family                                         |
| Stachyose |               | Glyma.12g234800 | 23.75 | Kunitz family trypsin and protease inhibitor protein                      |
| Stachyose |               | Glyma.12g234900 | 28.99 | Kunitz family trypsin and protease inhibitor protein                      |
| Stachyose |               | Glyma.12g235000 | 31.64 | Unknown function                                                          |
| Stachyose |               | Glyma.12g235100 | 34.32 | Nucleoporin autopeptidase                                                 |



|             |               |                 |       |                                                                      |
|-------------|---------------|-----------------|-------|----------------------------------------------------------------------|
| Stachyose   |               | Glyma.12g235200 | 44.82 | OXIDOREDUCTASE, 2OG-FE II OXYGENASE FAMILY PROTEIN                   |
| Stachyose   |               | Glyma.12g235300 | 48.96 | OXIDOREDUCTASE, 2OG-FE II OXYGENASE FAMILY PROTEIN                   |
| Stachyose   | Gm14_4487163  | Glyma.14g056000 | 53.01 | Sorting nexin                                                        |
| Stachyose   |               | Glyma.14g056100 | 46.13 | Sorting nexin 2b                                                     |
| Stachyose   |               | Glyma.14g056200 | 31    | Laccase 5                                                            |
| Stachyose   |               | Glyma.14g056300 | 25.65 | Integrase-type DNA-binding superfamily protein                       |
| Stachyose   |               | Glyma.14g056400 | 0     | Polyketide cyclase/dehydrase and lipid transport superfamily protein |
| Stachyose   |               | Glyma.14g056500 | 0.42  | Unknown function                                                     |
| Stachyose   |               | Glyma.14g056600 | 13.07 | Glycosyl hydrolase family 85                                         |
| Stachyose   |               | Glyma.14g056700 | 25.65 | Glycosyl hydrolase family 85                                         |
| Stachyose   | Gm18_7423285  | Glyma.18g077600 | 36.79 | Lateral organ boundaries (LOB) domain family protein                 |
| Stachyose   |               | Glyma.18g077700 | 43.85 | DEK domain-containing chromatin associated protein                   |
| Stachyose   |               | Glyma.18g077800 | 25.76 | DEK domain-containing chromatin associated protein                   |
| Stachyose   |               | Glyma.18g077900 | 9.83  | Integral component of membrane                                       |
| Stachyose   |               | Glyma.18g078000 | 1.54  | Disease resistance protein (CC-NBS-LRR class) family                 |
| Stachyose   |               | Glyma.18g078100 | 18.41 | NB-ARC domain-containing disease resistance protein                  |
| Stachyose   |               | Glyma.18g078200 | 33.70 | Integral component of membrane                                       |
| Total sugar | Gm02_8369052  | Glyma.02g093500 | 39.54 | Phospholipase D beta 1                                               |
| Total sugar |               | Glyma.02g093600 | 17.87 | Binding                                                              |
| Total sugar |               | Glyma.02g093700 | 0.32  | RNA-binding (RRM/RBD/RNP motifs) family protein                      |
| Total sugar |               | Glyma.02g093800 | 14.06 | Protein binding                                                      |
| Total sugar |               | Glyma.02g093900 | 33.82 | WUSCHEL related homeobox 13                                          |
| Total sugar |               | Glyma.02g094000 | 37.63 | Basic helix-loop-helix (BHLH) DNA-binding superfamily protein        |
| Total sugar | Gm05_2353434  | Glyma.05g026800 | 50.18 | Exostosin family protein                                             |
| Total sugar |               | Glyma.05g026900 | 34.09 | Mini zinc finger 2                                                   |
| Total sugar |               | Glyma.05g027000 | 13.58 | MYB domain protein 94                                                |
| Total sugar |               | Glyma.05g027100 | 0.27  | Alpha/beta-hydrolases superfamily protein                            |
| Total sugar |               | Glyma.05g027200 | 6.75  | Unknown function                                                     |
| Total sugar |               | Glyma.05g027300 | 13.26 | NAP1-related protein 2                                               |
| Total sugar |               | Glyma.05g027400 | 35.30 | Teosinte branched, cycloidea and PCF (TCP) 14                        |
| Total sugar | Gm05_6149022  | Glyma.05g063500 | 14.99 | Ethylene responsive element binding factor 5                         |
| Total sugar |               | Glyma.05g063600 | 27.55 | Ethylene responsive element binding factor 1                         |
| Total sugar |               | Glyma.05g063700 | 42.49 | Unknown function                                                     |
| Total sugar |               | Glyma.05g063800 | 46.97 | Ubiquitin C-terminal hydrolase 3                                     |
| Total sugar | Gm05_35918853 | Glyma.05g168200 | 43.86 | Magnesium transporter 6                                              |
| Total sugar |               | Glyma.05g168300 | 27.11 | Phospholipase D delta                                                |
| Total sugar |               | Glyma.05g168400 | 25.74 | 2Fe-2S ferredoxin-like superfamily protein                           |
| Total sugar |               | Glyma.05g168500 | 19.85 | Transmembrane nine 1                                                 |
| Total sugar |               | Glyma.05g168600 | 0     | UDP-Glucose:glycoprotein glucosyltransferases                        |
| Total sugar |               | Glyma.05g168700 | 10.38 | Arabidopsis trithorax-related protein 5                              |

|             |               |                 |       |                                                                                             |
|-------------|---------------|-----------------|-------|---------------------------------------------------------------------------------------------|
| Total sugar |               | Glyma.05g168800 | 16.71 | Protein kinase superfamily protein                                                          |
| Total sugar |               | Glyma.05g168900 | 18.26 | Glycine cleavage t-protein family                                                           |
| Total sugar |               | Glyma.05g169000 | 29.04 | MEMBRALIN/KINETOCHORE PROTEIN NUF2                                                          |
| Total sugar |               | Glyma.05g169100 | 40.38 | RMLC-like cupins superfamily protein                                                        |
| Total sugar |               | Glyma.05g169200 | 44.16 | RMLC-like cupins superfamily protein                                                        |
| Total sugar | Gm06_14414191 | Glyma.06g171700 | 42.97 | Leucine-rich repeat protein kinase family protein                                           |
| Total sugar |               | Glyma.06g171800 | 30.55 | Adenylate kinase family protein                                                             |
| Total sugar |               | Glyma.06g171900 | 17.16 | Amp-dependent synthetase and ligase family protein                                          |
| Total sugar |               | Glyma.06g172000 | 6.183 | Zn-dependent exopeptidases superfamily protein                                              |
| Total sugar |               | Glyma.06g172100 | 1.55  | Cell growth regulatory protein cgr11                                                        |
| Total sugar |               | Glyma.06g172200 | 6.04  | Unknown function                                                                            |
| Total sugar |               | Glyma.06g172300 | 15.5  | Nuclear protein X1                                                                          |
| Total sugar |               | Glyma.06g172400 | 21.44 | Nucleic acid-binding, ob-fold-like protein                                                  |
| Total sugar |               | Glyma.06g172500 | 32.43 | Unknown function                                                                            |
| Total sugar | Gm09_3173391  | Glyma.09g037300 | 41.37 | WD40/YVTN repeat-like-containing domain                                                     |
| Total sugar |               | Glyma.09g037400 | 36.14 | DNA-DIRECTED RNA POLYMERAS                                                                  |
| Total sugar |               | Glyma.09g037500 | 28.31 | Unknown function                                                                            |
| Total sugar |               | Glyma.09g037600 | 25.92 | Unknown function                                                                            |
| Total sugar |               | Glyma.09g037700 | 20.97 | Integral component of membrane                                                              |
| Total sugar |               | Glyma.09g037800 | 12.09 | Mitochondrial import inner membrane translocase subunit<br>TIM17/TIM22/TIM23 family protein |
| Total sugar |               | Glyma.09g037900 | 0     | Protein predicted to be involved in carbohydrate<br>metabolism                              |
| Total sugar |               | Glyma.09g038000 | 5.94  | Dihydrolipoyl dehydrogenases                                                                |
| Total sugar |               | Glyma.09g038100 | 12.84 | Ribosomal L29e protein family                                                               |
| Total sugar |               | Glyma.09g038200 | 19.84 | ADP RIBOSYLATION FACTOR-RELATED                                                             |
| Total sugar |               | Glyma.09g038300 | 26.65 | Calmodulin binding;transcription regulators                                                 |
| Total sugar |               | Glyma.09g038400 | 43.58 | Integral component of membrane                                                              |
| Total sugar | Gm11_28687660 | Glyma.11g204900 | 51.42 | Cysteine-rich RLK (RECEPTOR-like protein kinase) 2                                          |
| Total sugar |               | Glyma.11g205000 | 44.15 | NAD(P)-binding Rossmann-fold superfamily protein                                            |
| Total sugar |               | Glyma.11g205100 | 43.23 | Zinc finger protein 4                                                                       |
| Total sugar |               | Glyma.11g205200 | 24.11 | Cysteine-rich RLK (RECEPTOR-like protein kinase) 2                                          |
| Total sugar | Gm12_35531777 | Glyma.12g193300 | 49.44 | MYB domain protein 101                                                                      |
| Total sugar |               | Glyma.12g193400 | 40.16 | Zinc-binding dehydrogenase family protein                                                   |
| Total sugar |               | Glyma.12g193500 | 27.94 | Alkenal reductase                                                                           |
| Total sugar |               | Glyma.12g193600 | 14.18 | Galactosyltransferase family protein                                                        |
| Total sugar |               | Glyma.12g193700 | 12    | Unknown function                                                                            |
| Total sugar |               | Glyma.12g193800 | 19.81 | Aconitase 3                                                                                 |
| Total sugar |               | Glyma.12g193900 | 29.58 | Unknown function                                                                            |
| Total sugar |               | Glyma.12g194000 | 35.45 | MATE efflux family protein                                                                  |
| Total sugar |               | Glyma.12g194100 | 46.18 | Glutamate receptor 5                                                                        |
| Total sugar | Gm14_6503731  | Glyma.14g076900 | 51.47 | Brassinosteroid signalling positive regulator (BZR1) family<br>protein                      |
| Total sugar |               | Glyma.14g077000 | 43.02 | Methyltransferase mt-a70 family protein                                                     |

|             |               |                 |       |                                                               |
|-------------|---------------|-----------------|-------|---------------------------------------------------------------|
| Total sugar |               | Glyma.14g077100 | 14.79 | Protein of unknown function (DUF607)                          |
| Total sugar |               | Glyma.14g077200 | 0     | LEISHMANOLYSIN-LIKE PEPTIDASE                                 |
| Total sugar |               | Glyma.14g077300 | 4.87  | Thaumatococcus-like protein 3                                 |
| Total sugar |               | Glyma.14g077400 | 19.52 | Thaumatococcus-like protein 3                                 |
| Total sugar |               | Glyma.14g077500 | 30.33 | LEISHMANOLYSIN-LIKE PEPTIDASE                                 |
| Total sugar | Gm15_49568824 | Glyma.15g262500 | 41.77 | Cysteine synthase d1                                          |
| Total sugar |               | Glyma.15g262600 | 34.08 | Uncharacterized conserved protein (DUF2358)                   |
| Total sugar |               | Glyma.15g262700 | 16.46 | Photosystem ii reaction center protein T                      |
| Total sugar |               | Glyma.15g262800 | 8.07  | Zinc transporter 1 precursor                                  |
| Total sugar |               | Glyma.15g262900 | 4.48  | Zinc knuckle (CCHC-type) family protein                       |
| Total sugar |               | Glyma.15g263000 | 13.25 | Carbohydrate-binding x8 domain superfamily protein            |
| Total sugar |               | Glyma.15g263100 | 26.6  | Aldolase-type TIM barrel family protein                       |
| Total sugar | Gm15_51132707 | Glyma.15g273400 | 49.69 | WIP domain protein 5                                          |
| Total sugar |               | Glyma.15g273500 | 15.12 | Integral component of membrane                                |
| Total sugar |               | Glyma.15g273600 | 0     | ADP/ATP carrier 2                                             |
| Total sugar |               | Glyma.15g273700 | 5.42  | Unknown function                                              |
| Total sugar |               | Glyma.15g273800 | 9.66  | Unknown function                                              |
| Total sugar |               | Glyma.15g273900 | 16.24 | Delta subunit of MT ATP synthase                              |
| Total sugar |               | Glyma.15g274000 | 23.33 | Telomerase reverse transcriptase                              |
| Total sugar | Gm18_7423285  | Glyma.18g077600 | 43.87 | DEK domain-containing chromatin associated protein            |
| Total sugar |               | Glyma.18g077700 | 25.76 | DEK domain-containing chromatin associated protein            |
| Total sugar |               | Glyma.18g077800 | 9.83  | Integral component of membrane                                |
| Total sugar |               | Glyma.18g077900 | 1.54  | Disease resistance protein (CC-NBS-LRR class) family          |
| Total sugar |               | Glyma.18g078000 | 18.41 | NB-ARC domain-containing disease resistance protein           |
| Total sugar |               | Glyma.18g078100 | 33.7  | Integral component of membrane                                |
| Total sugar | Gm18_12706792 | Glyma.18g109500 | 37.75 | RNI-like superfamily protein                                  |
| Total sugar |               | Glyma.18g109600 | 15.06 | Cytochrome b561/ferric reductase transmembrane protein family |
| Total sugar |               | Glyma.18g109700 | 10.27 | Integral component of membrane                                |
| Total sugar |               | Glyma.18g109800 | 50.6  | Vacuoleless1 (VCL1)                                           |
| Total sugar | Gm18_56065506 | Glyma.18g278800 | 51.59 | S-adenosylmethionine decarboxylase                            |
| Total sugar |               | Glyma.18g278900 | 42.78 | Methylenetetrahydrofolate reductase family protein            |
| Total sugar |               | Glyma.18g279000 | 35.88 | Integral membrane hrf1 family protein                         |
| Total sugar |               | Glyma.18g279100 | 40.16 | Unknown function                                              |
| Total sugar |               | Glyma.18g279200 | 31.96 | DNA-DIRECTED RNA POLYMERASE III SUBUNIT RPC6                  |
| Total sugar |               | Glyma.18g279300 | 30.27 | Late embryogenesis abundant protein (LEA) family protein      |
| Total sugar |               | Glyma.18g279400 | 23.72 | Cofactor-independent phosphoglycerate mutase                  |
| Total sugar |               | Glyma.18g279500 | 13.06 | CDC27 family protein                                          |
| Total sugar |               | Glyma.18g279600 | 4.479 | Unknown function                                              |
| Total sugar |               | Glyma.18g279700 | 0     | Unknown function                                              |
| Total sugar |               | Glyma.18g279800 | 8.69  | Trichome birefringence-like 1                                 |
| Total sugar |               | Glyma.18g279900 | 19.42 | Trichome birefringence-like 19                                |
| Total sugar |               | Glyma.18g280000 | 27.23 | Unknown function                                              |

---

|             |                 |       |                                          |
|-------------|-----------------|-------|------------------------------------------|
| Total sugar | Glyma.18g280100 | 29.24 | Integral component of membrane           |
| Total sugar | Glyma.18g280200 | 35.17 | Protein kinase superfamily protein       |
| Total sugar | Glyma.18g280300 | 45.34 | Cysteine proteinases superfamily protein |

---

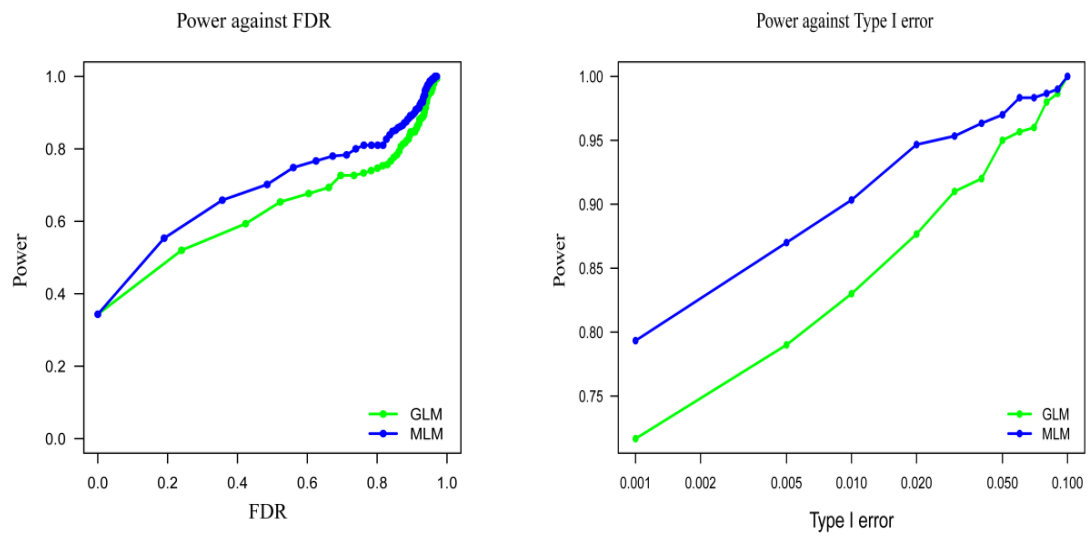

Figure S1 Model-compare FDR and type I error plot of association analysis for 323 soybean accessions.

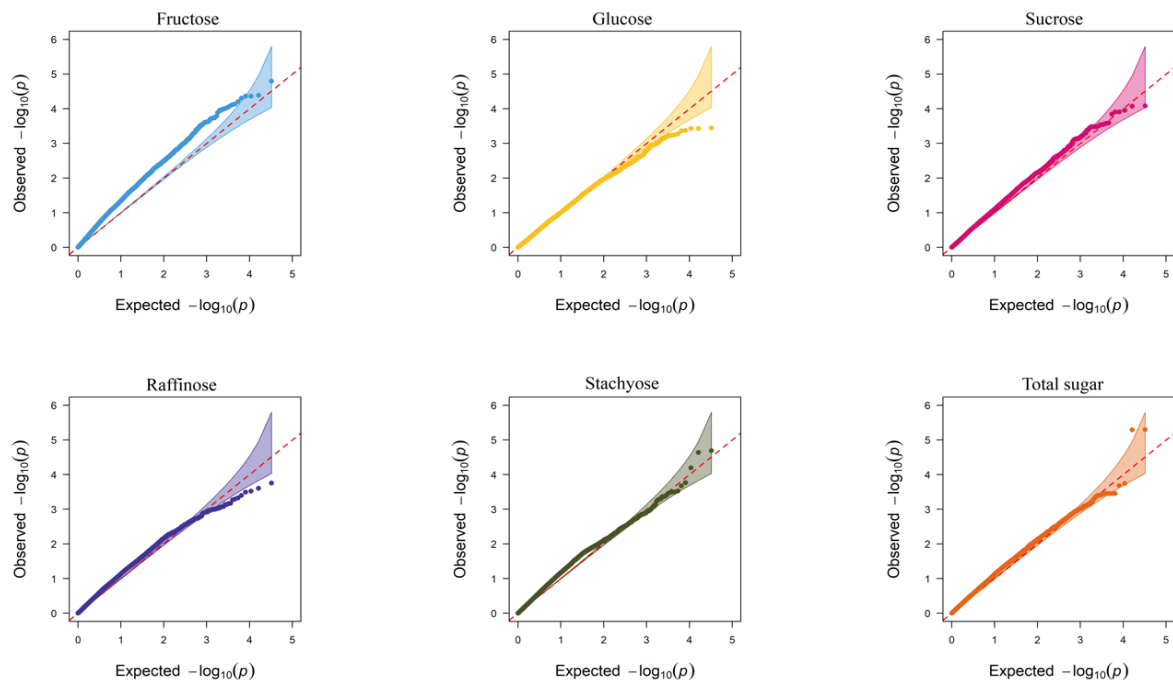

Figure S2 Quantile-quantile plot of association analysis for 323 soybean accessions.
